# Supplementary material for: Genotype Phenotype Correlation in Dent Disease 2 and Review of the Literature: OCRL Gene Pleiotropism or Extreme Phenotypic Variability of Lowe Syndrome?
Source: MDPI journal article supplement (doi:10.3390/genes12101597), 2021-10-11
Supplement: s1 [file s1]

## Supplementary Material

**Table S1. Clinical and genetic data of our cohort of DD2 patients (n=35).** Patients carrying new mutations are highlighted in bold. Y: present, N: absent, N/A: data not available,  $\beta$ 2MG: urinary beta-2 microglobulin, RBP: retinol binding protein, CNS: central nervous system, CK: creatin kinase, LDH: lactate dehydrogenase. eGFR was estimated using the Bedside Schwartz formula; ESRD end stage renal disease; PTH Parathyroid hormone; BUN blood urea nitrogen

| #        | DOB         | Genotype                                                  | AA change               | Age at diagnosis | Age of molecular diagnosis | weight    | height     | Growth height  |
|----------|-------------|-----------------------------------------------------------|-------------------------|------------------|----------------------------|-----------|------------|----------------|
| 34       | 11/10/2004  | large deletion/complex rearrangement Ex3 c.187_199+449del | p.Arg63fs               | 11yrs            | 11yrs 2mo                  | 34,5      | 123        | Below 5        |
| 33       | 05/08/2011  | Ex 5 c.260_260delA                                        | p.Gln87Argfs*19         | 2yrs             | 3yrs 9mo                   | N/A       | N/A        | N/A            |
| <b>1</b> | <b>1961</b> | <b>Ex5 c.309_310delCT</b>                                 | <b>p.His103Glnfs*27</b> | <b>14</b>        | <b>48</b>                  | <b>39</b> | <b>145</b> | <b>Below 5</b> |
| 2        | 1990        | Ex5 c.314T>A                                              | p.Leu105*               | 13               |                            | 31,9      | 137        | Below 5        |
| 23       | 16/07/2002  | IVS6 c.439+3A>G r.350_439 del Ex6 inframe                 | p.Arg100_Gly129 del     | 6y 4mo           |                            | 20        | 108        | Below 5        |
| 3        | 1999        | Ex7 c.533delC                                             | p.Pro178Hisfs*6         | 7y 1mo           |                            | 30        | 118        | Below 25       |
| 4        | 2009        | Ex7 c.533delC                                             | p.Pro178Hisfs*6         | 1 y 7 m          |                            | 10,95     | 79         | Below 25       |
| <b>5</b> | <b>2003</b> | <b>Ex7 c.543delC</b>                                      | <b>p.Ser183Glnfs*2</b>  | <b>13</b>        |                            | <b>39</b> | <b>137</b> | <b>Below 5</b> |
| 36       | 14/05/2012  | IVS7 c.560+1G>C                                           | p.Met187fs              | 6yrs             | 6yrs                       | 14,7      | 98         | Below 5        |
| 6        | 1994        | Ex10 c.860T>C                                             | p.Phe287Ser             | 10               |                            | 30        | 125        | Below 5        |
| 8        | 2009        | Ex11 c.952C>T                                             | p.Arg318Cys             | 5y 5mo           |                            |           | Normal     | N/A            |
| 9        | 04/04/1992  | Ex 11 c.952 C>T                                           | p.Arg318Cys             | 17 y 9 m         | 17 y 9 m                   | 61        | 165,5      | Below 10       |
| 10       | 04/08/1996  | Ex 11 c.952 C>T                                           | p.Arg318Cys             | 13 y 5 m         | 13 y 5 m                   | 65        | 149        | Below 10       |
| 7        | 1995        | Ex11 c.952C>T                                             | p.Arg318Cys             | 10y 3mo          |                            | 38        | 135,8      | Below 50       |
| 28       | 31/03/1999  | Ex11 c.952C>T                                             | p.Arg318Cys             | 15yrs 8m         | 16yrs 6mo                  | 40,4      | 141,4      | Below 5        |
| 29       | 09/10/2001  | Ex11 c.952C>T                                             | p.Arg318Cys             | 14yrs 6 mo       | 14yrs 6mo                  | 40,6      | 144        | Below 5        |

|    |            |                 |                |                                 |           |                    |                     |          |
|----|------------|-----------------|----------------|---------------------------------|-----------|--------------------|---------------------|----------|
| 11 | 2002       | Ex11 c.953G>A   | p.Arg318His    | 9                               |           | 28,8               | 121,5               | Below 5  |
| 12 | 2007       | Ex11 c.953G>A   | p.Arg318His    | 5                               |           | 19,5               | 107                 | Below 50 |
| 13 | 16/03/2009 | Ex 11 c.953G>T  | p.Arg318Leu    | 5                               | 5         | 17                 | 97,9                | Below 5  |
| 14 | 21/03/2005 | Ex 12 c.1133C>T | p.Ala378Val    | 6                               | 9         | 23,2               | 122,5               | Below 5  |
| 15 | 09/08/2007 | Ex 12 c.1133C>T | p.Ala378Val    | 4                               | 7         | 19,5               | 111                 | Below 5  |
| 26 | 23/02/2007 | Ex12 c.1156A>G  | p.Arg386Gly    | 7yrs 5 mo<br>(sympotatic age 4) | 8yrs 8m   | 16,4               | 102,6               | Below 5  |
| 27 | 19/09/2000 | Ex12 c.1156A>G  | p.Arg386Gly    | 13yrs 6mo                       | 15yrs     | 38,7               | 149,7               | Below 5  |
| 16 | 18/09/2002 | Ex15 c.1477C>T  | p.Arg493Trp    | 9y 3m                           | 9y 6m     | 31,5               | 129                 | Below 25 |
| 17 | 2001       | Ex15 c.1567G>A  | p.Asp523Asn    | 4y7mo                           |           | 16                 | 104                 | Below 50 |
| 18 | 2006       | Ex15 c.1567G>A  | p.Asp523Asn    | 1 y 9 m                         |           | 9,6                | 78,5                | Below 5  |
| 19 | 04/09/1994 | Ex15 c.1567G>A  | p.Asp523Asn    | 14 y 10 m                       | 15 y 6 m  | 92.7<br>(@17y10mo) | 162.6<br>(@17y10mo) | Below 5  |
| 20 | 16/05/2000 | Ex15 c.1567G>A  | p.Asp523Asn    | 2y                              | 9y 4m     | 68<br>(@14y7mo)    | 153<br>(@14y7mo)    | Below 5  |
| 30 | 14/09/2000 | E15 c.1573A>C   | p.Lys525Gln    | 14yrs 4mo                       | 14yr 5mo  | 64,2               | 152,2               | Below 25 |
| 31 | 09/04/2002 | E15 c.1573A>C   | p.Lys525Gln    | 13yrs 2mo                       | 13yr 8mo  | 48,8               | 145,7               | Below 5  |
| 35 | 14/05/2016 | Ex17 c.1865delG | p.Gly622Afs*22 | 3mo                             | 1yr 6mo   | 10                 | 74                  | Below 5  |
| 24 | 05/09/2004 | Ex18 c.2078C>T  | p.Pro693Leu    | 8 yrs                           | 8yrs      | 46,6               | 128                 | Normal   |
| 25 | 09/08/2005 | Ex18 c.2078C>T  | p.Pro693Leu    | 7yrs 2 mo                       | 7yrs 5 mo | 23                 | 114                 | Below 5  |
| 21 | N/A        | Ex19 c.2211G>C  | p.Glu437Asp    | 10                              |           | 27,5               | 118,8               | Below 5  |
| 22 | N/A        | Ex19 c.2211G>C  | p.Glu437Asp    | 11                              |           | 27,5               | 125                 | Below 5  |

**Table S1. (Continue)**

| #        | LMWP                           | albuminuria                     | proteinuria                                 | Nephrotic Syndrome | calciuria                  | hypercalciuria | serum creatinine              | eGFR       | CKD      | ESRD     |
|----------|--------------------------------|---------------------------------|---------------------------------------------|--------------------|----------------------------|----------------|-------------------------------|------------|----------|----------|
| 34       | β2MG 780 mg/L;<br>230769 ug/g  | 288 mg/L (in 2013,<br>9yrs)     | 2024mg/24h                                  | N                  | 7.1 24h                    | N/A            | 0.58mg/dL                     | 88         | 2        | N/A      |
| 33       | β2MG333mg/L,<br>α2MG:539 mg/L  | 1900 mg/L                       | 1,26                                        | N                  | 10.1 mg/dL                 | Y              | 0.5 mg/dL                     | N/A        |          | N/A      |
| <b>1</b> |                                |                                 | <b>Y</b>                                    |                    | <b>N/A</b>                 |                | <b>N/A</b>                    | <b>N/A</b> |          | <b>N</b> |
| 2        | β2MG 12500ug/24h               |                                 | 1300mg/24h                                  | N                  | N/A                        |                |                               | N/A        |          |          |
| 23       | β2MG 94750ug/L                 | 1 g/24h                         |                                             |                    | 7.7 mg/kg/24h              | Y              | 0,56 mg/dL                    | 80         | 2        | N        |
| 3        | β2MG 15300ug/24h               |                                 | 623mg/24h                                   | N                  | 5.8 mg/kg/24h              | Y              |                               | N/A        |          |          |
| 4        | N/A                            | N/A                             | 150mg/dl                                    | N                  | N/A                        |                | 0,26 mg/dL                    | 125        | 1        | N        |
| <b>5</b> | <b>Y</b>                       |                                 | <b>62 mg/kg/24h</b>                         | <b>N</b>           |                            |                | <b>55 umol/L (0,63 mg/dL)</b> | <b>90</b>  | <b>1</b> |          |
| 36       | N/A                            | N/A                             | N/A                                         |                    | N/A                        |                | N/A                           | N/A        |          | N/A      |
| 6        | β2MG 81567ug/24h               | 70.3 mg/24h                     | 690mg/24h                                   | N                  | 4.1 mg/kg/24h              | Y              | 0,64 mg/dL                    | 81         | 2        | N        |
| 8        | Y                              | 100-300 mg/dl                   | 1.4-4.4 mg/mg                               | ?                  | N                          |                |                               | N/A        |          |          |
| 9        | β2MG >4mg/L                    |                                 | 1.47 mg/mg -<br>1385 mg/m <sup>2</sup> /24h | Y                  | 0,30 mg/mg                 | Y              | 0,75 mg/dL                    | 91         | 1        | N        |
| 10       | β2MG >4mg/L                    | 1,01 mg/mg -<br>634,63mg/mq/24h | 2.06 mg/mg -<br>1292.7 mg/mq/24h            | Y                  | 0.38 mg/mg                 | Y              | 0,9 mg/dL                     | 68         | 2        | N        |
| 7        | β2MG 85600ug/24h               |                                 | 1200 mg/24h                                 | N                  | 3-7 mg/kg (iper)           | Y              |                               | N/A        |          | N        |
| 28       | RBP: 3455 mc/L;<br>β2MG100mg/L | 117.1 mg/L                      | 147mg/dl                                    | N                  | 0.8 mmol/L<br>(3.21 mg/dl) | Y              | 82 umol/L<br>(0.93mg/dl)      | 63         | 2        | N        |
| 29       | N/A                            | N/A                             | 1.92, 2.03g/24 h                            | N                  | 2.28mmol/L<br>(9.14 mg/dl) | Y              | 58umol/L (0.66 mg/dl)         | 90         | 1        | N        |
| 11       | tubular proteinuria            | N/A                             | Y                                           |                    | Y                          |                | 0,36 mg/dL                    | 143        | 1        | N        |
| 12       | β2MG 50000 ug/24h              | 90.2 mg/24h                     | 560 mg/24h                                  | N                  | 6.35 mg/kg/24h             | Y              | 0,43 mg/dL                    | 103        | 1        | N        |
| 13       | β2MG 123000 ug/L               | 266,7 mg/g                      | 5.5 mg/mg                                   | Y                  | 0.9 mg/mg                  | Y              | 0,45 mg/dL                    | 90         | 1        | N        |

|    |                           |                                  |                                                |   |                                             |   |                                                 |       |     |     |
|----|---------------------------|----------------------------------|------------------------------------------------|---|---------------------------------------------|---|-------------------------------------------------|-------|-----|-----|
| 14 | 110000 ng/ml              |                                  | 2.3 mg/mg-<br>978mg/mq/24h                     | Y | 0,26 mg/mg                                  | Y | 0,39 mg/dL                                      | 130   | 1   |     |
| 15 | 100000 ng/ml              |                                  | 2.2 mg/mg-473<br>mg/mq/24h                     | N | 0,12 mg/mg                                  | N | 0,32 mg/dL                                      | 143   | 1   |     |
| 26 | RBP: 111000 mcg/L<br>2013 | N/A                              | 137.8 mg/dL in<br>medical records<br>2011 3yrs | N | 51 mg/dl                                    | Y | 0.37 md/dL @2011<br>3yrs (0.39 at 2013<br>6yrs) | 115,0 | 1,0 | N   |
| 27 | RBP: 147000 mcg/L         | N/A                              | N/A                                            |   | 29.2 mg/dl                                  | Y | 0.71 mg/dL                                      | 87    | 2   | N   |
| 16 | β2MG >4mg/L               | 0.38 mg/mg -<br>228,54 mg/mq/24h | 1140 mg/mq/24h                                 | Y | 6.8 mg/kg/24h                               | Y | 0,42 mg/dL                                      | 127   | 1   | N   |
| 17 | β2MG 53900ug/24h          |                                  | 960mg/24h                                      | N | N/A                                         |   |                                                 | N/A   |     |     |
| 18 | N/A                       | 13 mg/dl                         | 459mg/24h                                      | N | N/A                                         |   | 0,26 mg/dL                                      | 125   | 1   | N   |
| 19 | β2MG >4mg/L               |                                  | 1.66 mg/mg -<br>1637 mg/mq/24h                 | Y | 0.45 mg/mg                                  | Y | 1,53 mg/dL                                      | 44    | 3   | N   |
| 20 | β2MG >4mg/L               |                                  | 2.15 mg/mg                                     | Y | 0.38 mg/mg                                  | Y | 0,88 mg/dL                                      | 72    | 2   | N   |
| 30 | β2MG 0.52 mg/L            | N/A                              | 0.99 mg/dl                                     | N | 3 mg/dL                                     | Y | 0.5 mg/dL                                       | 126   | 1   | N   |
| 31 | N/A                       | N/A                              |                                                |   | 12 mg/dL                                    | Y | 0.5 mg/dL                                       | 120   | 0   | N   |
| 35 | N/A                       | N/A                              | N/A                                            |   | N/A                                         |   | N/A                                             | N/A   |     | N/A |
| 24 | β2MG 127333<br>mcg/L      | 45000 mg/L                       | Y; 194 mg/dL                                   | N | 10mg/dl                                     |   |                                                 | N/A   |     | N   |
| 25 | β2MG 176812 mg/L          | 14.1 mg/L                        | 448 mg/dL                                      | Y | 35.7 mg/dL (two<br>weeks later<br>8.1mg/dl) | Y | 0.6 mg/dL                                       | 78    | 2   | N   |
| 21 | β2MG 14500ug/24h          |                                  | 2100mg/24h                                     | N | N/A                                         | Y |                                                 | N/A   |     |     |
| 22 | β2MG 16300ug/24h          |                                  | 1530mg/24h                                     | N | N/A                                         | Y |                                                 | N/A   |     |     |

Table S1. (Continue)

| #  | serum albumin | serum potassium | PTH        | acidosis/<br>HCO <sub>3</sub> | serum phosphate            | Hypophosphatemia | Hyperphosphaturia | TRP or TmP/GFR | glycosuria | aminoaciduria | BUN | Hematological abnormalities |
|----|---------------|-----------------|------------|-------------------------------|----------------------------|------------------|-------------------|----------------|------------|---------------|-----|-----------------------------|
| 34 | 4.5 g/dL      | 4.1 mmol/L      | N/A        | 22mmol/ml                     | 4.7 mg/dL                  | N                | N/A               | N/A            | N/A        | N/A           |     | N/A                         |
| 33 | 4.5 gr/dl     | 4.6mEq/L        | N/A        | N/A                           | 5.8mg/dL                   | N                | N/A               | N/A            | N/A        | N/A           |     | N/A                         |
| 1  | N/A           | N/A             | N/A        | N/A                           | N/A                        | N/A              | N/A               | N/A            | Y          |               |     |                             |
| 2  |               |                 | 18 ng/l    | 26 mmol/l                     | 1.26 mmol/l                | N                |                   |                | Y          | Y             |     |                             |
| 23 |               |                 | N          | N                             |                            | Y                | N                 | 85%            | N          | Y             |     |                             |
| 3  |               |                 | 3 pg/ml    | 26 mmol/l                     | 1.45 mmol/l                | N                |                   |                | Y          | Y             |     |                             |
| 4  | 3,95 g/dL     | 4.12 mEq/L      | 14 pg/ml   | 24.3mEq/L                     | 5.38 mg/dl                 | N/A              |                   | N/A            | N          | N/A           |     | N                           |
| 5  | 44 g/L        | 3.9mmol/L       |            |                               | 1.48 mmol/L                |                  | Y                 |                |            |               |     |                             |
| 36 | N/A           | N/A             | N/A        | N/A                           | 2.5 mg/dL                  | Y                | N/A               | N/A            | N/A        | N/A           |     | N/A                         |
| 6  |               | 4               | 36 ng/l    | 26 mmol/l                     | 2.5 mmol/l                 | N                |                   | N/A            | N          | N             |     | N                           |
| 8  |               |                 |            |                               |                            |                  |                   | >82%           | N          | N             |     |                             |
| 9  | 50,5 g/dL     | 4,9             | 64,2 pg/ml | 23                            | 4 mg/dl                    |                  |                   | 83%            | N          | N             |     | N                           |
| 10 | 56 g/dL       | 4,4             | 80,3 pg/ml | 22,6                          | 4.6 mg/dl                  |                  |                   | 80%            | N          | N             |     | N                           |
| 7  |               |                 | 26 pg/ml   | 25                            | 4 mg/dl                    | N                |                   | 78%            | N          | ND            |     |                             |
| 28 | 40g/L         | 4.4mmol/L       | N/A        | N/A                           | 3.99mg/dL<br>(1.29 mmol/L) | N                | N/A               | N/A            | N/A        | N/A           |     | N                           |
| 29 | 33g/L         | 3.6 mmol/L      | N/A        | N/A                           | 1.30 mmol/L                | N                | N/A               | N/A            | N/A        | N/A           |     | N                           |
| 11 |               | 5,3             | 38 ng/l    |                               | N/A                        | N                |                   | N/A            | N          | N             |     | N                           |
| 12 |               | 3,8             | N/A        |                               | 1.53 mmol/l                | N                |                   | N/A            | N          | N             |     | N                           |
| 13 | 51 g/dL       | 3,6             | 25 pg/ml   | 23,2                          | 4,53 mg/dl                 |                  |                   | 83,6%          | N          |               |     | N                           |
| 14 | 42 g/dL       | 4,0             | 26 pg/ml   | 23,6                          | 5,4 mg/dl                  |                  |                   |                | N          |               |     |                             |

|    |                           |                                 |               |                       |             |     |     |     |     |     |                          |     |
|----|---------------------------|---------------------------------|---------------|-----------------------|-------------|-----|-----|-----|-----|-----|--------------------------|-----|
| 15 | 43,1 g/dL                 | 3,9                             |               | 24,1                  | 5,1 mg/dl   |     |     |     | N   |     |                          |     |
| 26 | 4.5<br>@10/2011<br>(4yrs) | 4.1mmol/L<br>@10/2011<br>(4yrs) | N/A           | 20mmol/L              | N/A         | N/A | N/A | N/A | N   | N/A | 16mg/dL                  | N   |
| 27 | N/A                       | N/A                             | N/A           | N/A                   | 4.6 mg/dL   | N   | N/A | N/A | N/A | N/A | N/A                      | N   |
| 16 | 49                        | 4,6                             | 51 pg/ml      | 25 mEq/L              | 5.2 mg/dl   | N   |     | 85% | N   | N   |                          | N   |
| 17 |                           |                                 | N/A           | 25 mmol/l             | 1.58 mmol/l | N   |     |     | N   | Y   |                          |     |
| 18 | 4,08                      | 3.7 mEq/L                       | N/A           | 22.5mEq/L             | 5.11 mg/dl  | N/A |     | N/A | N   | N   |                          | N   |
| 19 | 49,2                      | 4,1                             | 4,1<br>pg/ml  | 24,8                  | 3.5 mg/dl   |     |     | 49% | Y   | Y   |                          | N   |
| 20 | 42                        | 4,1                             | 15,9<br>pg/ml | 22,5                  | 5.7 mg/dl   |     |     | 85% | Y   | Y   |                          | N   |
| 30 |                           | 4.8 in 2016<br>mEq/L            |               | 28mmol/L<br>in 2016   | 4.6 mg/dL   | N   | N/A | N/A | N   | N/A |                          | N   |
| 31 | 4.4mg/dl                  | N/A                             | 15 pg/ml      | 28mmol/L              | 4.4 mg/dL   | N   | N/A | N/A | N/A | N/A |                          | N   |
| 35 | N/A                       | N/A                             | N/A           | N/A                   | 1.19 mmol/L | Y   | N/A | N/A | N/A | N/A |                          | N/A |
| 24 | 4.5 g/dL                  | 3.9 mEq/L                       |               | 20 mEq/L              | 4.6mg/dL    | N   | N/A | N/A | N   | N/A | 38 mg/dl                 | N/A |
| 25 | 4.6 g/dL                  | 3.5 mEq/L                       |               | 24 mEq/L              |             | N   |     | N/A | Y   |     | 25mg/dl<br>on<br>11/2013 | N/A |
| 21 |                           |                                 | 20 ng/l       | Acidosis<br>17 mmol/l | 1.13mmol/l  | Y   |     | 79% | Y/N | N   |                          |     |
| 22 |                           |                                 | 25 ng/l       | Acidosis<br>17 mmol/l | 1.13 mmol/l | Y   |     | 89% | Y/N | Y/N |                          |     |

Table S1. (Continue)

| #  | rickets | Hematuria | Nephrocalcinosis | Nephro/Urolithiasis | Family History                              | Hypertension | cataract | ocular abnormalities       | CNS                                                                      | CK (units) | LDH (units) |
|----|---------|-----------|------------------|---------------------|---------------------------------------------|--------------|----------|----------------------------|--------------------------------------------------------------------------|------------|-------------|
| 34 | N       | N         | N                | N                   | Y father and father's brother kidney stones | N            | N/A      | N/A                        | N                                                                        | N/A        | N/A         |
| 33 | N       | N         | N/A              | N                   | N                                           | N            | N/A      | N/A                        | N                                                                        | N/A        | 319 U/L     |
| 1  | N       | Y         | N                | N                   |                                             | N            | N        | N                          | developmental delay                                                      | N          |             |
| 2  | N       |           | N                | N                   | Y                                           |              | N        | N                          | N                                                                        | 368 U/L    |             |
| 23 | Y       |           | N                | N                   | Y                                           | 88/44        |          | Y (glaucoma)               | attention deficit hyperactivity disorder (ADHD), mild mental retardation | Y          | Y           |
| 3  | N       |           | N                | N                   | Y                                           |              | N        | N                          | Y                                                                        | 336 U/L    |             |
| 4  | N       | N         | Y                | N                   | Y                                           | N            | N        | N                          | Hypotonia, psycho-motor and language delay                               | 302 U/L    | 468 U/L     |
| 5  |         | Y         | N                | N                   |                                             | N            |          |                            | developmental delay, hypoacusia                                          | Y          |             |
| 36 | N/A     | Y         | Y                | Y                   | N                                           | N/A          | N/A      | N/A                        | N/A                                                                      | N/A        | N/A         |
| 6  | N       | Y         | Y                | N                   | Y                                           | N            | N        | N                          | learning and behavioural impairments                                     | N          | 456 U/L     |
| 8  |         |           | N                |                     |                                             |              | N        | N                          | N                                                                        |            |             |
| 9  | N       |           | N/A              | N                   |                                             | N            | N        | Y (corneal abrasion)       | developmental delay                                                      | 159 U/l    | 447 U/l     |
| 10 | N       |           | N                | N                   |                                             | N            | N        | Y (thickening of the lens) | developmental delay                                                      | 397 U/L    | 685 U/L     |
| 7  | N       |           | Y                | N                   | N                                           |              |          |                            |                                                                          | 180 UI/L   |             |
| 28 | N       | N/A       | N/A              | N                   | N                                           | N            | N/A      |                            | Y "squint" delay onset at 5yrs                                           | N/A        | N/A         |
| 29 | N       | N/A       | N                | N                   | N                                           | N            | N/A      | N/A                        | N                                                                        | N/A        | N/A         |

|    |     |     |           |            |   |              |     |                                                                                   |                                    |            |         |
|----|-----|-----|-----------|------------|---|--------------|-----|-----------------------------------------------------------------------------------|------------------------------------|------------|---------|
| 11 | N   | Y   | Y         | Y          |   | Y            | N   | N                                                                                 |                                    | Y          | N/A     |
| 12 | N   | Y   | Y         | N          |   | N            | N   | Y (retinopathy type 1)                                                            |                                    |            | N/A     |
| 13 | N   |     | Y (4 yrs) | Y (4 yrs)  |   | N            | N   | N                                                                                 | N                                  | 293        | 369     |
| 14 | N   |     | Y         | Y          |   | N            | N   | N                                                                                 | N                                  | 151 U.I./L | 271 U/L |
| 15 | N   |     | N         | N          |   | N            | N   | N                                                                                 | N                                  | 110 UI/L   | 289/L   |
| 26 | N   | Y   | N         | Y (@ 2014) | N | N            | N/A | N/A                                                                               | N                                  | N/A        | N/A     |
| 27 | N   | N   | N/A       | Y          | N | N            | N/A | N/A                                                                               | N                                  | N/A        | N/A     |
| 16 | N   | Y   | Y         | N          |   | N            | N   | N                                                                                 | developmental delay, hyperactivity | 274 U/L    | 630 U/L |
| 17 | N   |     | N         | N          | N |              |     | Y (glaucoma)                                                                      | N                                  | 238 U/L    |         |
| 18 | N   | N   | N         | N          | Y | N            | N   | N                                                                                 | N                                  | 444 U/L    | 421 U/L |
| 19 | Y   |     | Y 3 y 9 m | y 17 y 4 m |   | N            | N   | N                                                                                 | developmental delay                | 684 U/L    | 655 U/L |
| 20 | Y   |     | 8y        | y 10y 4m   |   | N            | N   | N                                                                                 | developmental delay                | 307 U/L    | 627 U/L |
| 30 | N   | N   | N         | N          | Y | N on an ACEi | N/A | N/A                                                                               | N                                  | N/A        | N/A     |
| 31 | N   | N   | N         | Y          | Y | N on an ACEi | N/A | N/A                                                                               | Attention deficit disorder (ADD)   | N/A        | N/A     |
| 35 | N/A | N/A | N/A       | Y          | N | N/A          | N/A | Y (glaucoma)                                                                      | N/A                                | N/A        | N/A     |
| 24 | N/A | Y   | N         | N          | N | N            | N/A | N/A                                                                               | N/A                                | N/A        | N/A     |
| 25 | N/A | Y   | N         | N          | N | N            | N/A | N/A                                                                               | N/A                                | N/A        | N/A     |
| 21 | N   |     | N         | N          | Y |              | N   | Y (bilateral cortical opacity of the lens, retinal dystrophy)                     | N                                  | N          |         |
| 22 | N   |     | Y         | Y          | Y |              | N   | Y (accentuation of the "Y" in the anterior segment of the eye with normal fundus) | N                                  | N          |         |



**Table S2. Genetic data and extrarenal signs of DD2 patients (n=143).** DD2 mutations and references refer to Table S3. Y: present, N: absent, N/A: not described. When present, parentheses indicate the number of patients described.

| Exon/<br>Intron | Type of<br>Mutation | Nucleotide           | Cases<br>(num) | Families<br>(num) | Ocular |             |               | CNS                           |                    |               | Muscular                       |                                 |               | Nationality                    | Mutation<br>reported<br>in LS |
|-----------------|---------------------|----------------------|----------------|-------------------|--------|-------------|---------------|-------------------------------|--------------------|---------------|--------------------------------|---------------------------------|---------------|--------------------------------|-------------------------------|
|                 |                     |                      |                |                   | Y      | N           | N/A           | Y                             | N                  | N/A           | Y                              | N                               | N/A           |                                |                               |
| 1               | IVS                 | c.40-14A>G           | 1              | 1                 |        | N           |               |                               | N (no<br>hypotony) |               |                                |                                 | N/A           | French                         |                               |
| 2               | Missense            | c.46G>C              | 1              | 1                 |        | N           |               |                               | N                  |               |                                | N<br>(both<br>CK<br>and<br>LDH) |               | Japanese                       |                               |
| 3               | Frameshift          | c.175_178delAATA     | 1              | 1                 |        | N           |               |                               |                    | N/A           |                                |                                 | N/A           | Japanese                       |                               |
| 3               | Gross<br>deletion   | c.187_199+449del     | 1              | 1                 |        |             | N/A           |                               | N                  |               |                                |                                 | N/A           |                                |                               |
| 3               | IVS                 | c.199+1G>T           | 1              | 1                 |        | N           |               |                               |                    | N/A           |                                |                                 | N/A           | Japanese                       |                               |
| 3               | IVS                 | c.199+1G>A           | 2              | 2                 |        | N           |               |                               | N (1pt)            | N/A<br>(1pt)  | Y (high<br>LDH 1pt)            |                                 | N/A<br>(1pt)  | Japanese,<br>European          |                               |
| 3-4             | Gross<br>deletion   | exons 3-4            | 2              | 2                 |        | N (1<br>pt) | N/A<br>(1pt)  |                               | N                  |               |                                |                                 | N/A           | French,<br>Chinese             |                               |
| 4               | Frameshift          | c.214_215delCT       | 1              | 1                 |        |             | N/A           |                               |                    | N/A           |                                |                                 | N/A           | Polish                         |                               |
| 4               | Frameshift          | c.217_218delTT       | 2              | 2                 |        | N           |               |                               | N                  |               |                                | N<br>(1pt)                      | N/A<br>(1pt)  | European,<br>Unknown           |                               |
| 4               | Nonsense            | c.208G>T             | 2              | 1                 |        | N           |               |                               |                    | N/A           |                                |                                 | N/A           | Japanese                       |                               |
| 5               | Frameshift          | c.259insT            | 1              | 1                 |        | N           |               |                               | N                  |               |                                |                                 | N/A           | Korean                         |                               |
| 5               | Frameshift          | c.260delA            | 5              | 5                 |        | N<br>(2pts) | N/A<br>(3pts) |                               | N (3pts)           | N/A<br>(2pts) | Y (2pts high<br>CK and<br>LDH) | N<br>(1pt)                      | N/A<br>(2pts) | Korean,<br>Turkish,<br>Chinese |                               |
| 5               | Frameshift          | c.265_266insGG       | 1              | 1                 |        | N           |               |                               | N                  |               | Y (high<br>LDH)                |                                 |               | Japanese                       |                               |
| 5               | Missense            | c.278A>G             | 1              | 1                 |        | N           |               |                               | N                  |               |                                |                                 | N/A           | Japanese                       |                               |
| 5               | Frameshift          | c.304_311delGAACACTG | 1              | 1                 |        | N           |               |                               | N                  |               | Y (high CK)                    |                                 |               | Japanese                       |                               |
| 5               | Frameshift          | c.309_310delICT      | 1              | 1                 |        | N           |               | Y<br>(developmental<br>delay) |                    |               |                                | N<br>(CK)                       |               | Italian                        |                               |

| Exon/<br>Intron | Type of<br>Mutation | Nucleotide         | Cases<br>(num) | Families<br>(num) | Ocular                                                                            |             |     | CNS                                                                                     |          |     | Muscular                                                                                                   |                                 |              | Nationality | Reported<br>in LS |
|-----------------|---------------------|--------------------|----------------|-------------------|-----------------------------------------------------------------------------------|-------------|-----|-----------------------------------------------------------------------------------------|----------|-----|------------------------------------------------------------------------------------------------------------|---------------------------------|--------------|-------------|-------------------|
|                 |                     |                    |                |                   | Y                                                                                 | N           | N/A | Y                                                                                       | N        | N/A | Y                                                                                                          | N                               | N/A          |             |                   |
| 5               | Frameshift          | c.310_313delTGTT   | 3              | 3                 |                                                                                   | N<br>(3pts) |     | Y (mild mental<br>retard 1pt)                                                           | N (2pts) |     | Y (high CK<br>and LDH<br>3pts)                                                                             |                                 |              | Macedonian  |                   |
| 5               | Frameshift          | c.312_315delTTTG   | 1              | 1                 |                                                                                   | N           |     |                                                                                         | N        |     |                                                                                                            |                                 | N/A          | Chinese     |                   |
| 5               | Nonsense            | c.269G>A           | 1              | 1                 |                                                                                   |             | N/A |                                                                                         |          | N/A |                                                                                                            |                                 | N/A          | Chinese     |                   |
| 5               | Nonsense            | c.314T>A           | 1              | 1                 |                                                                                   | N           |     |                                                                                         | N        |     | Y (high CK)                                                                                                |                                 |              | Italian     |                   |
| 6               | Frameshift          | c.412insA          | 2              | 1                 |                                                                                   | N           |     |                                                                                         | N        |     | Y (2pts high<br>CK and<br>LDH)                                                                             |                                 |              | German      |                   |
| 6               | Nonsense            | c.[407T>A; 408A>G] | 1              | 1                 |                                                                                   | N           |     |                                                                                         | N        |     |                                                                                                            | N<br>(both<br>CK<br>and<br>LDH) |              | Japanese    |                   |
| 6               | Missense            | c.430G>T           | 1              | 1                 |                                                                                   |             | N/A |                                                                                         |          | N/A |                                                                                                            |                                 | N/A          | Chinese     |                   |
| 6               | IVS                 | c.439+3A>G         | 1              | 1                 | Y<br>(Peripapillary<br>optic nerve<br>atrophy with<br>gray papillae,<br>glaucoma) |             |     | Y (Mild mental<br>retardation,<br>ADHD)                                                 |          |     | Y (high CK<br>and LDH)                                                                                     |                                 |              | Italian     |                   |
| 6               | IVS                 | c.440-2A>G         | 1              | 1                 |                                                                                   | N           |     |                                                                                         |          | N/A |                                                                                                            |                                 | N/A          | American    |                   |
| 7               | IVS                 | c.560+1G>C         | 1              | 1                 |                                                                                   |             | N/A |                                                                                         |          | N/A |                                                                                                            |                                 | N/A          |             |                   |
| 7               | Frameshift          | c.487_488insAA     | 1              | 1                 |                                                                                   | N           |     |                                                                                         | N        |     |                                                                                                            |                                 | N/A          | German      |                   |
| 7               | Frameshift          | c.506delA          | 3              | 3                 |                                                                                   | N           |     | Y (1pt mild<br>developmental<br>delay, 1pt mild<br>degree of<br>developmental<br>delay) | N (1pt)  |     | Y (1pt<br>elevated<br>muscle<br>enzymes in<br>serum, 1pt<br>muscle<br>hypoplasia -<br>primary<br>miopathy) |                                 | N/A<br>(1pt) | Korean      | Y [1]             |
| 7               | Frameshift          | c.523delC          | 2              | 1                 |                                                                                   | N           |     |                                                                                         | N        |     |                                                                                                            |                                 | N/A          | Chinese     |                   |

| Exon/<br>Intron | Type of<br>Mutation | Nucleotide             | Cases<br>(num) | Families<br>(num) | Ocular |             |               | CNS                                                                                         |          |               | Muscular                                                           |   |               | Nationality                                | Reported<br>in LS |
|-----------------|---------------------|------------------------|----------------|-------------------|--------|-------------|---------------|---------------------------------------------------------------------------------------------|----------|---------------|--------------------------------------------------------------------|---|---------------|--------------------------------------------|-------------------|
|                 |                     |                        |                |                   | Y      | N           | N/A           | Y                                                                                           | N        | N/A           | Y                                                                  | N | N/A           |                                            |                   |
| 7               | Frameshift          | c.533delC              | 2              | 1                 |        | N           |               | Y (DD99BS<br>mental delay,<br>DGL09BS<br>hypotonia,<br>psicomotor<br>and language<br>delay) |          |               | Y (high<br>LDH x1,<br>high CKx1)                                   |   |               | Italian                                    |                   |
| 7               | Frameshift          | c.534_543delACCTCCACCC | 1              | 1                 |        | N           |               | Y (mild mental<br>impairment,<br>mild<br>hypotonia)                                         |          |               |                                                                    |   | N/A           | Unknown                                    |                   |
| 7               | Frameshift          | c.543delC              | 1              | 1                 |        |             | N/A           | Y<br>(developmental<br>delay,<br>hypoacusia)                                                |          |               | Y (high CK)                                                        |   |               | Italian                                    |                   |
| 7               | Frameshift          | c.544delT              | 1              | 1                 |        | N           |               |                                                                                             | N        |               |                                                                    |   | N/A           | Chinese                                    |                   |
| 7               | Nonsense            | c.497C>A               | 1              | 1                 |        | N           |               |                                                                                             | N        |               |                                                                    |   | N/A           | Unknown                                    |                   |
| 7               | IVS                 | c.560+1G>A             | 1              | 1                 |        | N           |               | Y (mental<br>impairment)                                                                    |          |               |                                                                    |   | N/A           | English                                    |                   |
| 8               | Frameshift          | c.614delC              | 1              | 1                 |        |             | N/A           |                                                                                             |          | N/A           |                                                                    |   | N/A           | Chinese                                    |                   |
| 8               | Frameshift          | c.697delG              | 1              | 1                 |        |             | N/A           |                                                                                             |          | N/A           |                                                                    |   | N/A           | Chinese                                    |                   |
| 9               | Frameshift          | c.723insT              | 1              | 1                 |        |             | N/A           |                                                                                             |          | N/A           |                                                                    |   | N/A           | Chinese                                    |                   |
| 9               | Missense            | c.728T>C               | 3              | 2                 |        | N           |               | Y (1pt mild<br>developmental<br>delay)                                                      | N (2pts) |               | Y (1pt<br>muscle<br>hypoplasia<br>of both<br>upper<br>extremities) |   | N/A<br>(2pts) | Korean                                     |                   |
| 9               | Missense            | c.821T>C               | 5              | 5                 |        | N<br>(3pts) | N/A<br>(2pts) | Y (1pt<br>developmental<br>delay)                                                           | N (1pt)  | N/A<br>(3pts) | Y (1pt high<br>CK and<br>LDH)                                      |   | N/A<br>(4pts) | French,<br>Japanese,<br>German,<br>Chinese | Y [2]             |
| 10              | In-frame            | c.833_838delGAACTG     | 2              | 1                 |        | N           |               |                                                                                             | N        |               |                                                                    |   | N/A           | Chinese                                    |                   |

| Exon/<br>Intron | Type of<br>Mutation | Nucleotide | Cases<br>(num) | Families<br>(num) | Ocular                                                                     |              |               | CNS                                                                                                                                                                                         |          |               | Muscular                                                                                                                           |                                        |               | Nationality                                                                        | Reported<br>in LS |
|-----------------|---------------------|------------|----------------|-------------------|----------------------------------------------------------------------------|--------------|---------------|---------------------------------------------------------------------------------------------------------------------------------------------------------------------------------------------|----------|---------------|------------------------------------------------------------------------------------------------------------------------------------|----------------------------------------|---------------|------------------------------------------------------------------------------------|-------------------|
|                 |                     |            |                |                   | Y                                                                          | N            | N/A           | Y                                                                                                                                                                                           | N        | N/A           | Y                                                                                                                                  | N                                      | N/A           |                                                                                    |                   |
| 10              | Missense            | c.860T>C   | 1              | 1                 |                                                                            | N            |               | Y<br>(neurological<br>and<br>behavioural<br>impairment)                                                                                                                                     |          |               | Y (high<br>LDH)                                                                                                                    |                                        |               | Italian                                                                            |                   |
| 10              | Missense            | c.877A>G   | 1              | 1                 |                                                                            | N            |               |                                                                                                                                                                                             | N        |               |                                                                                                                                    | N<br>(both<br>CK<br>and<br>LDH)        |               | Japanese                                                                           |                   |
| 11              | Missense            | c.952C>T   | 17             | 13                | Y (1pt<br>thickening of<br>the lens, 1pt<br>corneal<br>abrasion)           | N<br>(11pts) | N/A<br>(4pts) | Y (2pts mild<br>mental<br>retardation;<br>2pts<br>developmental<br>delay, 1pt this<br>paper: "squint"<br>delay, 1pt<br>normal except<br>communication<br>skills, 1pt<br>ubelical<br>hernia) | N (7pts) | N/A<br>(3pts) | Y (1pt high<br>LDH, 2pts<br>high LDH,<br>2pts high<br>CK and<br>LDH, 1pt<br>high CK,<br>1pt mild<br>motor<br>development<br>delay) | N<br>(3pts)                            | N/A<br>(7pts) | French,<br>Japanese,<br>European,<br>Italian,<br>Czech,<br>Hungarian,<br>Israelian | Y [2]             |
| 11              | Missense            | c.953G>A   | 6              | 6                 | Y (1pt<br>retinopathy<br>type 1 )                                          | N<br>(4pts)  | N/A<br>(1pt)  |                                                                                                                                                                                             | N (2pts) | N/A<br>(4pts) | Y (1pt)                                                                                                                            | N<br>(1pt<br>both<br>CK<br>and<br>LDH) | N/A<br>(4pts) | Japanese,<br>Chinese,<br>Unknown,<br>Italian                                       |                   |
| 11              | Missense            | c.953G>T   | 1              | 1                 |                                                                            | N            |               |                                                                                                                                                                                             | N        |               | Y (high<br>LDH)                                                                                                                    |                                        |               | Italian                                                                            |                   |
| 11              | Missense            | c.962G>A   | 1              | 1                 | Y (clinically<br>not apparent<br>cataract with<br>no visual<br>impairment) |              |               | Y (mild mental<br>impairment)                                                                                                                                                               |          |               |                                                                                                                                    |                                        | N/A           | Unknown                                                                            | Y [3]             |
| 12              | Missense            | c.1060A>C  | 1              | 1                 |                                                                            | N            |               |                                                                                                                                                                                             | N        |               |                                                                                                                                    |                                        | N/A           | French                                                                             |                   |
| 12              | Missense            | c.1110C>G  | 1              | 1                 |                                                                            |              | N/A           |                                                                                                                                                                                             |          | N/A           |                                                                                                                                    |                                        | N/A           | Chinese                                                                            |                   |
| 12              | Missense            | c.1112T>C  | 1              | 1                 |                                                                            |              | N/A           |                                                                                                                                                                                             |          | N/A           |                                                                                                                                    |                                        | N/A           | Chinese                                                                            |                   |
| 12              | Missense            | c.1133C>T  | 2              | 1                 |                                                                            | N            |               |                                                                                                                                                                                             | N        |               |                                                                                                                                    | N                                      |               | Italian                                                                            |                   |
| 12              | Missense            | c.1156A>G  | 2              | 1                 |                                                                            |              | N/A           |                                                                                                                                                                                             | N        |               |                                                                                                                                    |                                        | N/A           | Unknown                                                                            |                   |

| Exon/<br>Intron | Type of<br>Mutation | Nucleotide  | Cases<br>(num) | Families<br>(num) | Ocular                                   |             |              | CNS                                                                                                                                      |          |               | Muscular                                                         |             |               | Nationality                                                  | Reported<br>in LS |
|-----------------|---------------------|-------------|----------------|-------------------|------------------------------------------|-------------|--------------|------------------------------------------------------------------------------------------------------------------------------------------|----------|---------------|------------------------------------------------------------------|-------------|---------------|--------------------------------------------------------------|-------------------|
|                 |                     |             |                |                   | Y                                        | N           | N/A          | Y                                                                                                                                        | N        | N/A           | Y                                                                | N           | N/A           |                                                              |                   |
| 12              | Missense            | c.1177A>T   | 1              | 1                 | Y (cataract,<br>early ocular<br>density) |             |              | Y (not<br>formally tested<br>clinically<br>impaired<br>cognitive<br>function,<br>depression)                                             |          |               | Y (high<br>LDH)                                                  |             |               | European                                                     |                   |
| 12              | Missense            | c.1196T>C   | 1              | 1                 |                                          |             | N/A          |                                                                                                                                          |          | N/A           |                                                                  |             | N/A           | Chinese                                                      |                   |
| 14              | Missense            | c.1419C>A   | 1              | 1                 |                                          |             | N/A          |                                                                                                                                          |          | N/A           |                                                                  |             | N/A           | Chinese                                                      |                   |
| 14              | Missense            | c.1430A>G   | 1              | 1                 |                                          |             | N/A          |                                                                                                                                          |          | N/A           |                                                                  |             | N/A           | Chinese                                                      |                   |
| 14              | Missense            | c.1430A>T   | 3              | 1                 |                                          | N           |              |                                                                                                                                          |          | N/A           |                                                                  |             | N/A           | Japanese                                                     |                   |
| 14              | Missense            | c.1436A>G   | 1              | 1                 |                                          | N           |              | Y (mild mental<br>retardation)                                                                                                           |          |               | Y (high CK<br>and LDH)                                           |             |               | German                                                       |                   |
| 14              | IVS                 | c.1467-2A>G | 2              | 1                 |                                          | N<br>(1pt)  | N/A<br>(1pt) |                                                                                                                                          | N (1pt)  | N/A<br>(1pt)  |                                                                  |             | N/A           | Polish                                                       |                   |
| 15              | Missense            | c.1477C>T   | 9              | 7                 |                                          | N<br>(8pts) | N/A<br>(1pt) | Y (1pt<br>impaired<br>cognitive<br>functioning<br>and hearing<br>loss, 1pt<br>developmental<br>delay, 1pt<br>something not<br>described) | N (4pts) | N/A<br>(2pts) | Y (1pt high<br>CK, 1pt<br>high CK and<br>LDH, 1pt<br>high LDH 5) | N<br>(2pts) | N/A<br>(4pts) | European,<br>Italian,<br>Macedonian,<br>Japanese,<br>Chinese |                   |
| 15              | Missense            | c.1502T>G   | 1              | 1                 |                                          |             | N/A          |                                                                                                                                          |          | N/A           |                                                                  |             | N/A           | Chinese                                                      |                   |
| 15              | Missense            | c.1514G>T   | 1              | 1                 |                                          |             | N/A          |                                                                                                                                          |          | N/A           |                                                                  |             | N/A           | Chinese                                                      |                   |
| 15              | Missense            | c.1567G>A   | 5              | 3                 | Y (1pt ocular<br>abnormalities)          | N<br>(4pts) |              | Y (2pts<br>developmental<br>delay)                                                                                                       | N (3pts) |               | Y (3pts high<br>LDH)                                             | N<br>(1pt)  | N/A<br>(1pt)  | Italian,<br>Chinese                                          | Y [4]             |
| 15              | Missense            | c.1573A>C   | 2              | 1                 |                                          |             | N/A          | Y (1pt<br>attention<br>deficit<br>disorder, 1pt<br>hearing loss)                                                                         |          |               |                                                                  |             | N/A           | Unknown                                                      |                   |
| 15              | Missense            | c.1576C>T   | 1              | 1                 |                                          | N           |              |                                                                                                                                          | N        |               |                                                                  |             | N/A           | Japanese                                                     |                   |
| 15              | Missense            | c.1598T>C   | 1              | 1                 |                                          | N           |              | Y (umbelical<br>hernia)                                                                                                                  |          |               | Y (high CK<br>and LDH)                                           |             |               | European                                                     |                   |

| Exon/<br>Intron | Type of<br>Mutation | Nucleotide  | Cases<br>(num) | Families<br>(num) | Ocular                                                 |   |              | CNS                                                   |   |              | Muscular                          |                                 |     | Nationality | Reported<br>in LS |
|-----------------|---------------------|-------------|----------------|-------------------|--------------------------------------------------------|---|--------------|-------------------------------------------------------|---|--------------|-----------------------------------|---------------------------------|-----|-------------|-------------------|
|                 |                     |             |                |                   | Y                                                      | N | N/A          | Y                                                     | N | N/A          | Y                                 | N                               | N/A |             |                   |
| 15              | IVS                 | c.1603-3G>C | 1              | 1                 |                                                        | N |              | Y (mild mental<br>retardation)                        |   |              | Y (high CK<br>and LDH)            |                                 |     | Japanese    |                   |
| 17              | Frameshift          | c.1865delG  | 1              | 1                 | Y (glaucoma)                                           |   |              |                                                       |   | N/A          |                                   |                                 | N/A | Unknown     |                   |
| 18              | Missense            | c.2039T>C   | 1              | 1                 | Y (cataract)                                           |   |              |                                                       | N |              |                                   | N                               |     | Japanese    | Y [5]             |
| 18              | Missense            | c.2078C>T   | 2              | 1                 |                                                        |   | N/A          |                                                       |   | N/A          |                                   |                                 | N/A | Unknown     |                   |
| 20              | Missense            | c.2206A>G   | 1              | 1                 |                                                        | N |              |                                                       |   | N/A          |                                   |                                 | N/A | Japanese    |                   |
| 20              | Missense            | c.2211G>C   | 2              | 1                 | Y (2pts mild<br>bilateral<br>cortical lens<br>opacity) |   |              |                                                       | N |              |                                   | N                               |     | Cape Verde  |                   |
| 20              | Missense            | c.2245G>T   | 1              | 1                 |                                                        | N |              |                                                       | N |              |                                   |                                 | N/A | Korean      |                   |
| 20              | IVS                 | c.2257-5G>A | 1              | 1                 |                                                        | N |              |                                                       | N |              | Y (elevated<br>CPK and/or<br>LDH) |                                 |     | Japan       | Y [6]             |
| 22              | Missense            | c.2396C>T   | 1              | 1                 |                                                        | N |              |                                                       | N |              |                                   |                                 | N/A | French      | Y [7,8]           |
| 22              | Missense            | c.2435T>C   | 2              | 1                 | Y (1pt<br>congenital<br>cataract)                      |   | N/A<br>(1pt) | Y (1pt slight<br>delay in<br>language<br>development) |   | N/A<br>(1pt) |                                   |                                 | N/A | Chinese     |                   |
| 23              | Nonsense            | c.2464C>T   | 1              | 1                 |                                                        |   | N/A          |                                                       |   | N/A          |                                   |                                 | N/A | Chinese     | Y [2,4,7–<br>10]  |
| 23              | Missense            | c.2486C>T   | 1              | 1                 |                                                        | N |              |                                                       | N |              |                                   | N<br>(both<br>CK<br>and<br>LDH) |     | Japanese    |                   |
| 24              | Frameshift          | c.2670delC  | 1              | 1                 |                                                        |   | N/A          |                                                       |   | N/A          |                                   |                                 | N/A | Chinese     |                   |

**Table S3. List of *OCRL* pathogenic variants reported in DD2 patients.** Numbering is according to the cDNA sequence (GenBank entry NM\_000276.4). The A of the ATG of the Methionine initiation codon is defined as nucleotide 1. IVS: splice site variant.

| Exon/<br>Intron | Type of<br>Mutation | Nucleotide                 | Protein          | Protein<br>domain                 | Reference                |
|-----------------|---------------------|----------------------------|------------------|-----------------------------------|--------------------------|
| 1               | IVS                 | c.40-14A>G                 | -                | PH                                | [2]                      |
| 2               | Missense            | c.46G>C                    | p.Glu16Gln       | PH                                | [11]                     |
| 3-4             | Gross<br>deletion   | exons 3-4                  |                  | PH                                | [2,12]                   |
| 3               | Frameshift          | c.175_178delAATA           | p.Asn59Alafs*14  | PH                                | [13]                     |
| 3               | Gross<br>deletion   | c.187_199+449del           | p.Arg63fs        | PH                                | [14]                     |
| 3               | IVS                 | c.199+1G>A                 | -                | PH                                | [13,15]                  |
| 3               | IVS                 | c.199+1G>T                 | -                | PH                                | [13]                     |
| 4               | Nonsense            | c.208G>T                   | p.Glu70*         | PH                                | [13]                     |
| 4               | Frameshift          | c.214_215delCT             | p.Leu72Phefs*2   | PH                                | [3]                      |
| 4               | Frameshift          | c.217_218delTT             | p.Leu73Aspfs*1   | PH                                | [15,16]                  |
| 5               | Frameshift          | c.259insT                  | p.Gln87Leufs*11  | PH                                | [8]                      |
| 5               | Frameshift          | c.260delA                  | p.Gln87Argfs*19  | PH                                | [3,17–19], this<br>paper |
| 5               | Frameshift          | c.265_266insGG             | p.Asp89Glyfs*18  | PH                                | [11]                     |
| 5               | Nonsense            | c.269G>A                   | p.Trp90*         | PH                                | [20]                     |
| 5               | Missense            | c.278A>G                   | p.Glu93Gly       | PH                                | [21]                     |
| 5               | Frameshift          | c.304_311delGAACACT<br>G   | p.Glu102Phefs*27 | PH                                | [13,22]                  |
| 5               | Frameshift          | c.309_310delCT             | p.His103Glnfs*27 | PH                                | This paper               |
| 5               | Frameshift          | c.310_313delTGTT           | p.Cys104*        | PH                                | [23–25]                  |
| 5               | Frameshift          | c.312_315delTTTG           | p.Cys104*        | PH                                | [26]                     |
| 5               | Nonsense            | c.314T>A                   | p.Leu105*        | PH                                | [27]                     |
| 6               | Nonsense            | c.[407T>A; 408A>G]         | p.Leu136*        | Linker                            | [11]                     |
| 6               | Frameshift          | c.412insA                  | p.Thr138Asnfs*2  | Linker                            | [17]                     |
| 6               | Missense            | c.430G>T                   | p.Val144Phe      | Linker                            | [28]                     |
| 6               | IVS                 | c.439+3A>G                 | -                | Linker                            | [19], This<br>paper      |
| 6               | IVS                 | c.440-2A>G                 | -                | Linker                            | [23]                     |
| 7               | Frameshift          | c.487_488insAA             | p.Ile164Lysfs*2  | Linker                            | [23]                     |
| 7               | Nonsense            | c.497C>A                   | p.Ser166*        | Linker                            | [16]                     |
| 7               | Frameshift          | c.506delA                  | p.Gln169Argfs*16 | Linker                            | [8,9]                    |
| 7               | Frameshift          | c.523delC                  | p.Arg175Glyfs*10 | Linker                            | [30]                     |
| 7               | Frameshift          | c.533delC                  | p.Pro178Hisfs*6  | Linker                            | [17], this<br>paper      |
| 7               | Frameshift          | c.534_543delACCTCCAC<br>CC | p.Pro179Phefs*3  | Linker                            | [16]                     |
| 7               | Frameshift          | c.543delC                  | p.Ser183Glnfs*2  | Linker                            | This paper               |
| 7               | Frameshift          | c.544delT                  | p.Ser183Glnfs*2  | Linker                            | [26]                     |
| 7               | IVS                 | c.560+1G>A                 | -                | Linker                            | [16]                     |
| 7               | IVS                 | c.560+1G>C                 | -                | Linker                            | [19], this<br>paper      |
| 8               | Frameshift          | c.614delC                  | p.Tyr205Tyrfs*45 | 5-phosphatase<br>(stop in exon 9) | [28]                     |
| 8               | Frameshift          | c.697delG                  | p.Glu233Asnfs*17 | 5-phosphatase<br>(stop in exon 9) | [28]                     |
| 9               | Frameshift          | c.723insT                  | p.Val244Cysfs*13 | 5-phosphatase                     | [28]                     |
| 9               | Missense            | c.728T>C                   | p.Phe243Ser      | 5-phosphatase                     | [8,9,31]                 |

|    |            |                     |                    |               |                                        |
|----|------------|---------------------|--------------------|---------------|----------------------------------------|
| 9  | Missense   | c.821T>C            | p.Ile274Thr        | 5-phosphatase | [2,13,17,28,32]                        |
| 10 | In-frame   | c.833_838delGAACGTG | p.Glu278_Leu279del | 5-phosphatase | [30]                                   |
| 10 | Missense   | c.860T>C            | p.Phe287Ser        | 5-phosphatase | [27]                                   |
| 10 | Missense   | c.877A>G            | p.Lys293Glu        | 5-phosphatase | [11]                                   |
| 11 | Missense   | c.952C>T            | p.Arg318Cys        | 5-phosphatase | [2,3,11,15,19,22,23,33–35], this paper |
| 11 | Missense   | c.953G>A            | p.Arg318His        | 5-phosphatase | [11,13,16,28], this paper              |
| 11 | Missense   | c.953G>T            | p.Arg318Leu        | 5-phosphatase | [3]                                    |
| 11 | Missense   | c.962G>A            | p.Gly321Glu        | 5-phosphatase | [16]                                   |
| 12 | Missense   | c.1060A>C           | p.Asn354His        | 5-phosphatase | [2]                                    |
| 12 | Missense   | c.1110C>G           | p.Cys370Trp        | 5-phosphatase | [20]                                   |
| 12 | Missense   | c.1112T>C           | p.Ile371Thr        | 5-phosphatase | [32]                                   |
| 12 | Missense   | c.1133C>T           | p.Ala378Val        | 5-phosphatase | [3], this paper                        |
| 12 | Missense   | c.1156A>G           | p.Arg386Gly        | 5-phosphatase | [19], this paper                       |
| 12 | Missense   | c.1177A>T           | p.Ile393Phe        | 5-phosphatase | [15]                                   |
| 12 | Missense   | c.1196T>C           | p.Phe399Ser        | 5-phosphatase | [32]                                   |
| 14 | Missense   | c.1419C>A           | p.Phe473Leu        | 5-phosphatase | [28]                                   |
| 14 | Missense   | c.1430A>G           | p.Tyr477Cys        | 5-phosphatase | [28]                                   |
| 14 | Missense   | c.1430A>T           | p.Tyr477Phe        | 5-phosphatase | [13]                                   |
| 14 | Missense   | c.1436A>G           | p.Tyr479Cys        | 5-phosphatase | [23]                                   |
| 14 | IVS        | c.1467-2A>G         | -                  | 5-phosphatase | [36,37]                                |
| 15 | Missense   | c.1477C>T           | p.Arg493Trp        | 5-phosphatase | [3,11,13,15,17,22,28]                  |
| 15 | Missense   | c.1502T>G           | p.Ile501Ser        | 5-phosphatase | [28]                                   |
| 15 | Missense   | c.1514G>T           | p.Gly505Val        | 5-phosphatase | [28]                                   |
| 15 | Missense   | c.1567G>A           | p.Asp523Asn        | 5-phosphatase | [3,26,27], this paper                  |
| 15 | Missense   | c.1573A>C           | p.Lys525Gln        | 5-phosphatase | [19], this paper                       |
| 15 | Missense   | c.1576C>T           | p.Pro526Ser        | 5-phosphatase | [21,38]                                |
| 15 | Missense   | c.1598T>C           | p.Ile533Thr        | 5-phosphatase | [15]                                   |
| 15 | IVS        | c.1603-3G>C         | p.Val535Glyfs*6    | 5-phosphatase | [39]                                   |
| 17 | Frameshift | c.1865delG          | p.Gly622Alafs*22   | ASH           | [19], this paper                       |
| 18 | Missense   | c.2039T>C           | p.Phe680Ser        | ASH           | [11]                                   |
| 18 | Missense   | c.2078C>T           | p.Pro693Leu        | ASH           | [19], this paper                       |
| 20 | Missense   | c.2206A>G           | p.Lys736Gln        | Rho-GAP       | [13]                                   |
| 20 | Missense   | c.2211G>C           | p.Glu737Asp        | Rho-GAP       | [27]                                   |
| 20 | Missense   | c.2245G>T           | p.Ala749Ser        | Rho-GAP       | [8]                                    |
| 20 | IVS        | c.2257-5G>A         | -                  | Rho-GAP       | [40]                                   |
| 22 | Missense   | c.2396C>T           | p.Pro799Leu        | Rho-GAP       | [2]                                    |
| 22 | Missense   | c.2435T>C           | p.Leu812Pro        | Rho-GAP       | [20,41]                                |
| 23 | Nonsense   | c.2464C>T           | p.Arg822*          | Rho-GAP       | [28]                                   |
| 23 | Missense   | c.2486C>T           | p.Pro829Leu        | Rho-GAP       | [11]                                   |
| 24 | Frameshift | c.2670delC          | p.Phe890Phefs*19   | Rho-GAP       | [28]                                   |



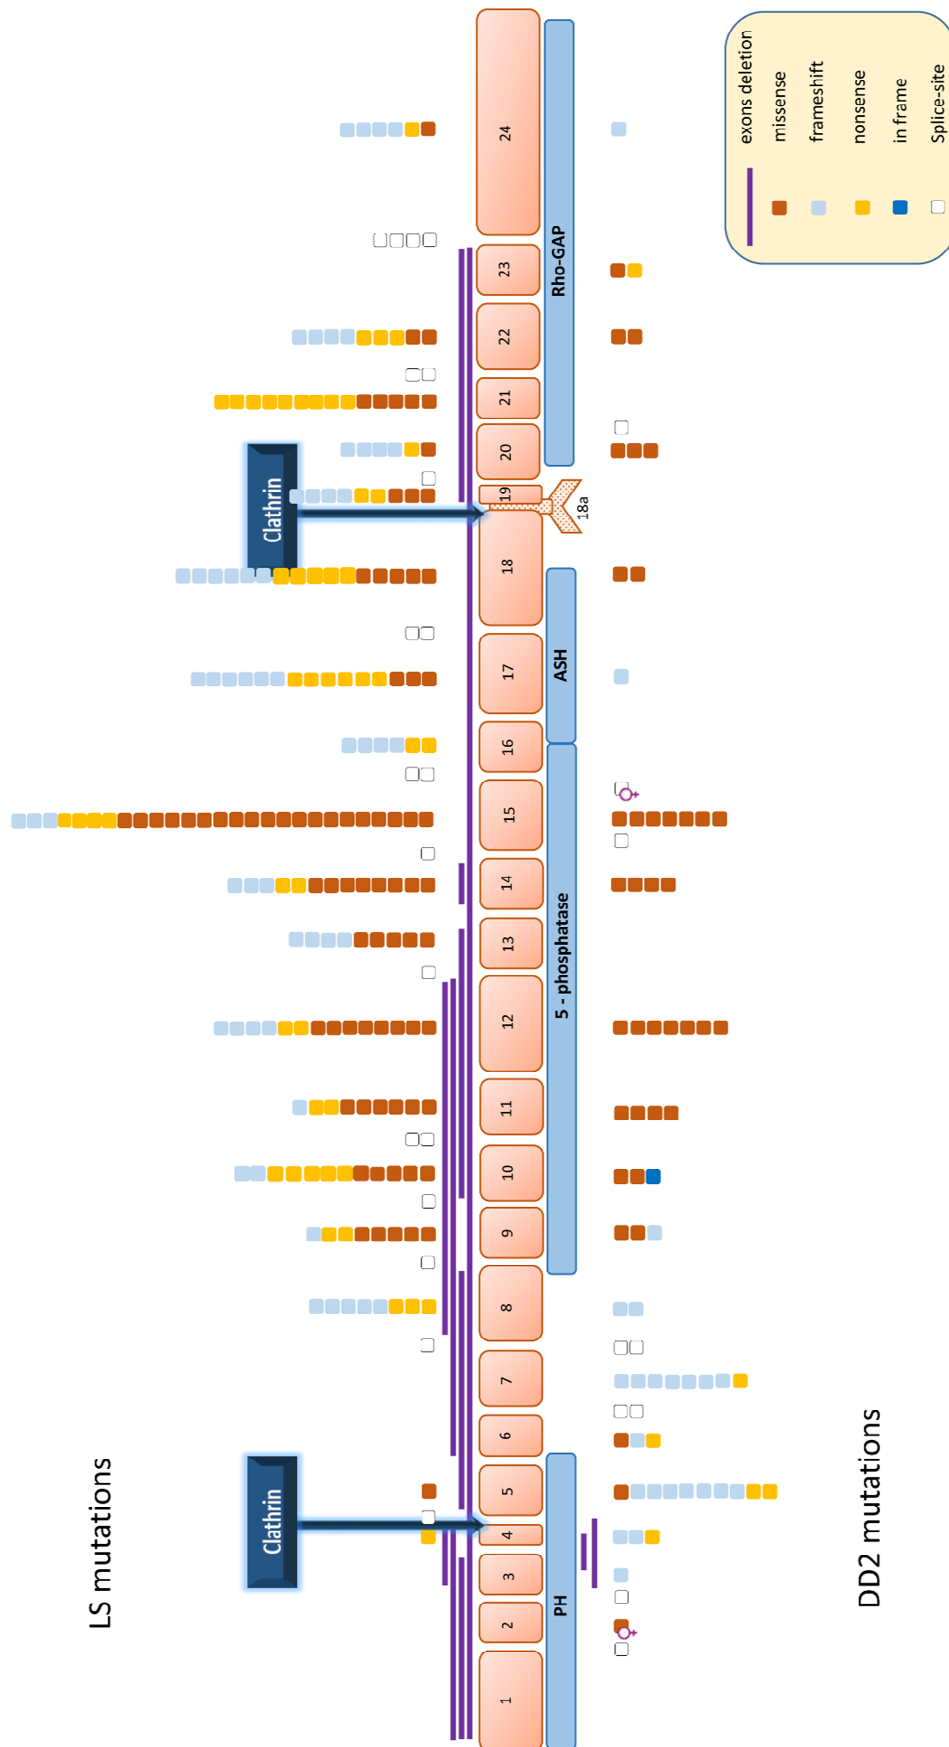

**Figure S1: Genogram showing the distribution of LS and DD2 mutations along the *OCRL* gene.** Upper panel shows LS mutations described in [42], lower panel shows DD2 mutations from Table S3.

## References

1. Lee, B.H.; Lee, S.H.; Choi, H.J.; Kang, H.G.; Oh, S.W.; Lee, D.S.; Ha, I.S.; Choi, Y.; Cheong, H.I. Decreased Renal Uptake of (99m)Tc-DMSA in Patients with Tubular Proteinuria. *Pediatr Nephrol* **2009**, *24*, 2211–2216, doi:10.1007/s00467-009-1238-2.
2. Hichri, H.; Rendu, J.; Monnier, N.; Coutton, C.; Dorseuil, O.; Poussou, R.V.; Baujat, G.; Blanchard, A.; Nobili, F.; Ranchin, B.; et al. From Lowe Syndrome to Dent Disease: Correlations between Mutations of the OCRL1 Gene and Clinical and Biochemical Phenotypes. *Hum. Mutat.* **2011**, *32*, 379–388, doi:10.1002/humu.21391.
3. Zaniew, M.; Böckenkamp, A.; Kolbuc, M.; La Scola, C.; Baronio, F.; Niemirska, A.; Szczepanska, M.; Bürger, J.; La Manna, A.; Miklaszewska, M.; et al. Long-Term Renal Outcome in Children with OCRL Mutations: Retrospective Analysis of a Large International Cohort. *Nephrol. Dial. Transplant.* **2018**, *33*, 85–94, doi:10.1093/ndt/gfw350.
4. Recker, F.; Zaniew, M.; Böckenhauer, D.; Miglietti, N.; Böckenkamp, A.; Moczulska, A.; Rogowska-Kalisz, A.; Laube, G.; Said-Conti, V.; Kasap-Demir, B.; et al. Characterization of 28 Novel Patients Expands the Mutational and Phenotypic Spectrum of Lowe Syndrome. *Pediatr Nephrol* **2015**, *30*, 931–943, doi:10.1007/s00467-014-3013-2.
5. Sugimoto, K.; Nishi, H.; Miyazawa, T.; Fujita, S.; Okada, M.; Takemura, T. A Novel OCRL1 Mutation in a Patient with the Mild Phenotype of Lowe Syndrome. *Tohoku J Exp Med* **2014**, *232*, 163–166, doi:10.1620/tjem.232.163.
6. Nakano, E.; Yoshida, A.; Miyama, Y.; Yabuuchi, T.; Kajiho, Y.; Kanda, S.; Miura, K.; Oka, A.; Harita, Y. Incomplete Cryptic Splicing by an Intronic Mutation of OCRL in Patients with Partial Phenotypes of Lowe Syndrome. *J Hum Genet* **2020**, *65*, 831–839, doi:10.1038/s10038-020-0773-3.
7. Zaniew, M.; Böckenkamp, A.; Kolbuc, M.; La Scola, C.; Baronio, F.; Niemirska, A.; Szczepanska, M.; Bürger, J.; La Manna, A.; Miklaszewska, M.; et al. Long-Term Renal Outcome in Children with OCRL Mutations: Retrospective Analysis of a Large International Cohort. *Nephrol. Dial. Transplant.* **2018**, *33*, 85–94, doi:10.1093/ndt/gfw350.
8. Park, E.; Choi, H.J.; Lee, J.M.; Ahn, Y.H.; Kang, H.G.; Choi, Y.M.; Park, S.J.; Cho, H.Y.; Park, Y.-H.; Lee, S.J.; et al. Muscle Involvement in Dent Disease 2. *Pediatr. Nephrol.* **2014**, *29*, 2127–2132, doi:10.1007/s00467-014-2841-4.
9. Cho, H.Y.; Lee, B.H.; Choi, H.J.; Ha, I.S.; Choi, Y.; Cheong, H.I. Renal Manifestations of Dent Disease and Lowe Syndrome. *Pediatr. Nephrol.* **2008**, *23*, 243–249, doi:10.1007/s00467-007-0686-9.
10. Zheng, B.; Chen, Q.; Wang, C.; Zhou, W.; Chen, Y.; Ding, G.; Jia, Z.; Zhang, A.; Huang, S. Whole-Genome Sequencing Revealed an Interstitial Deletion Encompassing OCRL and SMARCA1 Gene in a Patient with Lowe Syndrome. *Mol Genet Genomic Med* **2019**, *7*, e876, doi:10.1002/mgg3.876.
11. Sekine, T.; Komoda, F.; Miura, K.; Takita, J.; Shimadzu, M.; Matsuyama, T.; Ashida, A.; Igarashi, T. Japanese Dent Disease Has a Wider Clinical Spectrum than Dent Disease in Europe/USA: Genetic and Clinical Studies of 86 Unrelated Patients with Low-Molecular-Weight Proteinuria. *Nephrol. Dial. Transplant.* **2014**, *29*, 376–384, doi:10.1093/ndt/gft394.
12. Duan, N.; Huang, C.; Pang, L.; Jiang, S.; Yang, W.; Li, H. Clinical Manifestation and Genetic Findings in Three Boys with Low Molecular Weight Proteinuria - Three Case Reports for Exploring Dent Disease and Fanconi Syndrome. *BMC Nephrol* **2021**, *22*, 24, doi:10.1186/s12882-020-02225-6.
13. Sakakibara, N.; Nagano, C.; Ishiko, S.; Horinouchi, T.; Yamamura, T.; Minamikawa, S.; Shima, Y.; Nakanishi, K.; Ishimori, S.; Morisada, N.; et al. Comparison of Clinical and Genetic Characteristics between Dent Disease 1 and Dent Disease 2. *Pediatr. Nephrol.* **2020**, doi:10.1007/s00467-020-04701-5.
14. Duran, D.; Jin, S.C.; DeSpenza, T.; Nelson-Williams, C.; Cogal, A.G.; Abrash, E.W.; Harris, P.C.; Lieske, J.C.; Shimshak, S.J.; Mane, S.; et al. Digenic Mutations of Human OCRL Paralogs in Dent's Disease Type 2 Associated with Chiari I Malformation. *Hum Genome Var* **2016**, *3*, 16042, doi:10.1038/hgv.2016.42.
15. Böckenhauer, D.; Böckenkamp, A.; Nuutinen, M.; Unwin, R.; Van't Hoff, W.; Sirimanna, T.; Vrljicak, K.; Ludwig, M. Novel OCRL Mutations in Patients with Dent-2 Disease. *J Pediatr Genet* **2012**, *1*, 15–23, doi:10.3233/PGE-2012-005.
16. Shrimpton, A.E.; Hoopes, R.R.; Knohl, S.J.; Hueber, P.; Reed, A.A.C.; Christie, P.T.; Igarashi, T.; Lee, P.; Lehman, A.; White, C.; et al. OCRL1 Mutations in Dent 2 Patients Suggest a Mechanism for Phenotypic Variability. *Nephron Physiol* **2009**, *112*, p27-36, doi:10.1159/000213506.

17. Utsch, B.; Bökenkamp, A.; Benz, M.R.; Besbas, N.; Dötsch, J.; Franke, I.; Fründ, S.; Gok, F.; Hoppe, B.; Karle, S.; et al. Novel OCRL1 Mutations in Patients with the Phenotype of Dent Disease. *Am. J. Kidney Dis.* **2006**, *48*, 942.e1–14, doi:10.1053/j.ajkd.2006.08.018.
18. Zhang, Y.; Fang, X.; Xu, H.; Shen, Q. Genetic Analysis of Dent's Disease and Functional Research of CLCN5 Mutations. *DNA Cell Biol.* **2017**, *36*, 1151–1158, doi:10.1089/dna.2017.3731.
19. Cogal, A.G.; Jennifer Arroyo; Shah, R.J.; Reese, K.J.; Walton, B.N.; Reynolds, L.M.; Kennedy, G.N.; Seide, B.M.; Senum, S.R.; Baum, M.; et al. Comprehensive Genetic Analysis Reveals Complexity of Monogenic Urinary Stone Disease. *Kidney Int Rep* **2021**, submitted.
20. Deng, H.; Zhang, Y.; Xiao, H.; Yao, Y.; Zhang, H.; Liu, X.; Su, B.; Guan, N.; Zhong, X.; Wang, S.; et al. Phenotypic Spectrum and Antialbuminuric Response to Angiotensin Converting Enzyme Inhibitor and Angiotensin Receptor Blocker Therapy in Pediatric Dent Disease. *Mol Genet Genomic Med* **2020**, e1306, doi:10.1002/mgg3.1306.
21. Suruda, C.; Tsuji, S.; Yamanouchi, S.; Kimata, T.; Huan, N.T.; Kurosawa, H.; Hirayama, Y.; Tsukaguchi, H.; Saito, A.; Kaneko, K. Decreased Urinary Excretion of the Ectodomain Form of Megalin (A-Megalin) in Children with OCRL Gene Mutations. *Pediatr Nephrol* **2017**, *32*, 621–625, doi:10.1007/s00467-016-3535-x.
22. Sekine, T.; Nozu, K.; Iyengar, R.; Fu, X.J.; Matsuo, M.; Tanaka, R.; Iijima, K.; Matsui, E.; Harita, Y.; Inatomi, J.; et al. OCRL1 Mutations in Patients with Dent Disease Phenotype in Japan. *Pediatr. Nephrol.* **2007**, *22*, 975–980, doi:10.1007/s00467-007-0454-x.
23. Hoopes, R.R.; Shrimpton, A.E.; Knohl, S.J.; Hueber, P.; Hoppe, B.; Matyus, J.; Simckes, A.; Tasic, V.; Toenshoff, B.; Suchy, S.F.; et al. Dent Disease with Mutations in OCRL1. *Am. J. Hum. Genet.* **2005**, *76*, 260–267, doi:10.1086/427887.
24. Tasic, V.; Lozanovski, V.J.; Korneti, P.; Ristoska-Bojkovska, N.; Sabolic-Avramovska, V.; Gucev, Z.; Ludwig, M. Clinical and Laboratory Features of Macedonian Children with OCRL Mutations. *Pediatr. Nephrol.* **2011**, *26*, 557–562, doi:10.1007/s00467-010-1758-9.
25. Salihu, S.; Tosheska, K.; Cekovska, S.; Tasic, V. Incidental Detection of Dent-2 Disease in an Infant with Febrile Proteinuria. *Med Princ Pract* **2018**, *27*, 392–395, doi:10.1159/000490147.
26. Bao, Y.; Suo, L.; Qian, P.; Huang, H.; Yang, Y.; Tang, J.; Zhang, M.; Li, Z.; Wang, Y.; Liang, N.; et al. Clinical and Genetic Analysis of Dent Disease with Nephrotic Range Albuminuria in Shaanxi, China. *Sci China Life Sci* **2019**, *62*, 1590–1593, doi:10.1007/s11427-018-9829-0.
27. Tosetto, E.; Addis, M.; Caridi, G.; Meloni, C.; Emma, F.; Vergine, G.; Stringini, G.; Papalia, T.; Barbano, G.; Ghiggeri, G.M.; et al. Locus Heterogeneity of Dent's Disease: OCRL1 and TMEM27 Genes in Patients with No CLCN5 Mutations. *Pediatr. Nephrol.* **2009**, *24*, 1967–1973, doi:10.1007/s00467-009-1228-4.
28. Ye, Q.; Shen, Q.; Rao, J.; Zhang, A.; Zheng, B.; Liu, X.; Shen, Y.; Chen, Z.; Wu, Y.; Hou, L.; et al. Multicenter Study of the Clinical Features and Mutation Gene Spectrum of Chinese Children with Dent Disease. *Clin. Genet.* **2020**, *97*, 407–417, doi:10.1111/cge.13663.
29. Addis, M.; Meloni, C.; Tosetto, E.; Ceol, M.; Cristofaro, R.; Melis, M.A.; Vercelloni, P.; Del Prete, D.; Marra, G.; Anglani, F. An Atypical Dent's Disease Phenotype Caused by Co-Inheritance of Mutations at CLCN5 and OCRL Genes. *Eur. J. Hum. Genet.* **2013**, *21*, 687–690, doi:10.1038/ejhg.2012.225.
30. Li, F.; Yue, Z.; Xu, T.; Chen, M.; Zhong, L.; Liu, T.; Jing, X.; Deng, J.; Hu, B.; Liu, Y.; et al. Dent Disease in Chinese Children and Findings from Heterozygous Mothers: Phenotypic Heterogeneity, Fetal Growth, and 10 Novel Mutations. *J. Pediatr.* **2016**, *174*, 204–210.e1, doi:10.1016/j.jpeds.2016.04.007.
31. Lee, B.H.; Lee, S.H.; Choi, H.J.; Kang, H.G.; Oh, S.W.; Lee, D.S.; Ha, I.S.; Choi, Y.; Cheong, H.I. Decreased Renal Uptake of (99m)Tc-DMSA in Patients with Tubular Proteinuria. *Pediatr. Nephrol.* **2009**, *24*, 2211–2216, doi:10.1007/s00467-009-1238-2.
32. Zhao, S.L.; Zhao, F.; Sha, Y.G.; Chen, Q.X.; Cheng, X.Q.; Huang, S.M. [Clinical features and genetic variants of Dent disease in 10 children]. *Zhonghua Er Ke Za Zhi* **2018**, *56*, 289–293, doi:10.3760/cma.j.issn.0578-1310.2018.04.010.
33. De Mutiis, C.; Pasini, A.; La Scola, C.; Pugliese, F.; Montini, G. Nephrotic-Range Albuminuria as the Presenting Symptom of Dent-2 Disease. *Ital J Pediatr* **2015**, *41*, 46, doi:10.1186/s13052-015-0152-4.
34. Becker-Cohen, R.; Rinat, C.; Ben-Shalom, E.; Feinstein, S.; Ivgy, H.; Frishberg, Y. Vitamin A Deficiency Associated with Urinary Retinol Binding Protein Wasting in Dent's Disease. *Pediatr Nephrol* **2012**, *27*, 1097–1102, doi:10.1007/s00467-012-2121-0.

35. Bezdička, M.; Langer, J.; Háček, J.; Zieg, J. Dent Disease Type 2 as a Cause of Focal Segmental Glomerulosclerosis in a 6-Year-Old Boy: A Case Report. *Front Pediatr* **2020**, *8*, 583230, doi:10.3389/fped.2020.583230.
36. Preston, R.; Naylor, R.W.; Stewart, G.; Bierzynska, A.; Saleem, M.A.; Lowe, M.; Lennon, R. A Role for OCRL in Glomerular Function and Disease. *Pediatr. Nephrol.* **2020**, *35*, 641–648, doi:10.1007/s00467-019-04317-4.
37. Bierzynska, A.; McCarthy, H.J.; Soderquest, K.; Sen, E.S.; Colby, E.; Ding, W.Y.; Nabhan, M.M.; Kerecuk, L.; Hegde, S.; Hughes, D.; et al. Genomic and Clinical Profiling of a National Nephrotic Syndrome Cohort Advocates a Precision Medicine Approach to Disease Management. *Kidney Int.* **2017**, *91*, 937–947, doi:10.1016/j.kint.2016.10.013.
38. Kaneko, K.; Hasui, M.; Hata, A.; Hata, D.; Nozu, K. Focal Segmental Glomerulosclerosis in a Boy with Dent-2 Disease. *Pediatr. Nephrol.* **2010**, *25*, 781–782, doi:10.1007/s00467-009-1362-z.
39. Okamoto, T.; Sakakibara, N.; Nozu, K.; Takahashi, T.; Hayashi, A.; Sato, Y.; Nagano, C.; Matsuo, M.; Iijima, K.; Manabe, A. Onset Mechanism of a Female Patient with Dent Disease 2. *Clin Exp Nephrol* **2020**, *24*, 946–954, doi:10.1007/s10157-020-01926-4.
40. Nakano, E.; Yoshida, A.; Miyama, Y.; Yabuuchi, T.; Kajiho, Y.; Kanda, S.; Miura, K.; Oka, A.; Harita, Y. Incomplete Cryptic Splicing by an Intronic Mutation of OCRL in Patients with Partial Phenotypes of Lowe Syndrome. *J. Hum. Genet.* **2020**, doi:10.1038/s10038-020-0773-3.
41. He, G.; Zhang, H.; Cao, S.; Xiao, H.; Yao, Y. Dent's Disease Complicated by Nephrotic Syndrome: A Case Report. *Intractable Rare Dis Res* **2016**, *5*, 297–300, doi:10.5582/iridr.2016.01058.
42. De Matteis, M.A.; Staiano, L.; Emma, F.; Devuyt, O. The 5-Phosphatase OCRL in Lowe Syndrome and Dent Disease 2. *Nat Rev Nephrol* **2017**, *13*, 455–470, doi:10.1038/nrneph.2017.83.
